# Supplementary material
Source: Springer Nature journal article supplement (https://www.springermedizin.de/resource/supplementary/12968_2013_3322_MOESM5_ESM.pdf/9583626)

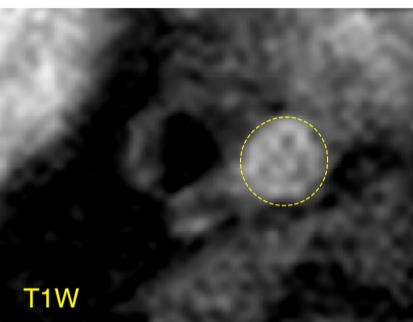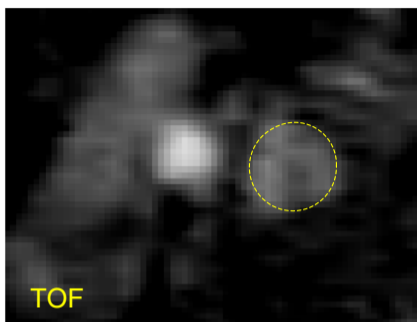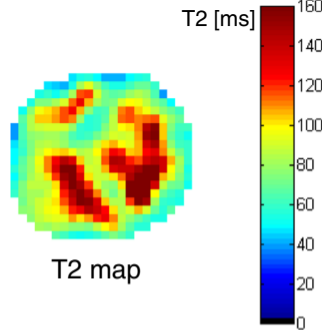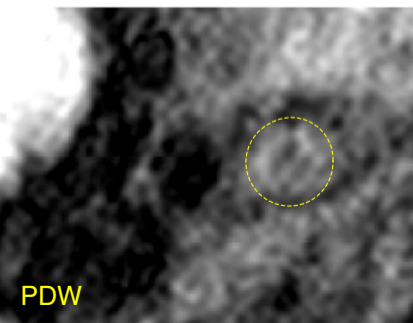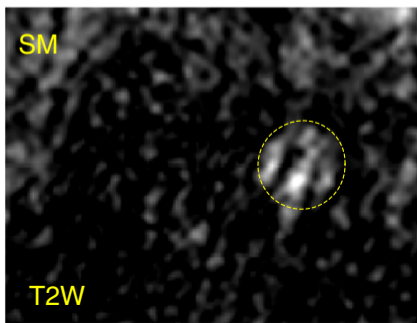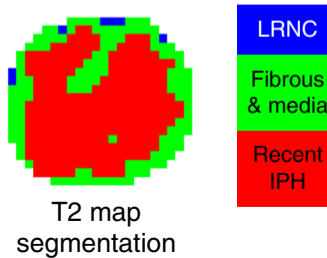

Supplement: MOESM5 [file 9583626]
